# Supplementary material for: A Germline Variant on Chromosome 4q31.1 Associates with Susceptibility to Developing Colon Cancer Metastasis
Source: PubMed Central journal article supplement (PMC4709047; doi:10.1371/journal.pone.0146435), 2016-01-11

S3 File:

LD PLOTS FROM HAPLOVIEW FOR STAGE IV AND STAGE I/II COLON CANCER

PATIENTS IN THE DISCOVERY DATASET

DISCOVERY DATASET: STAGE IV LD PLOT FROM HAPLOVIEW

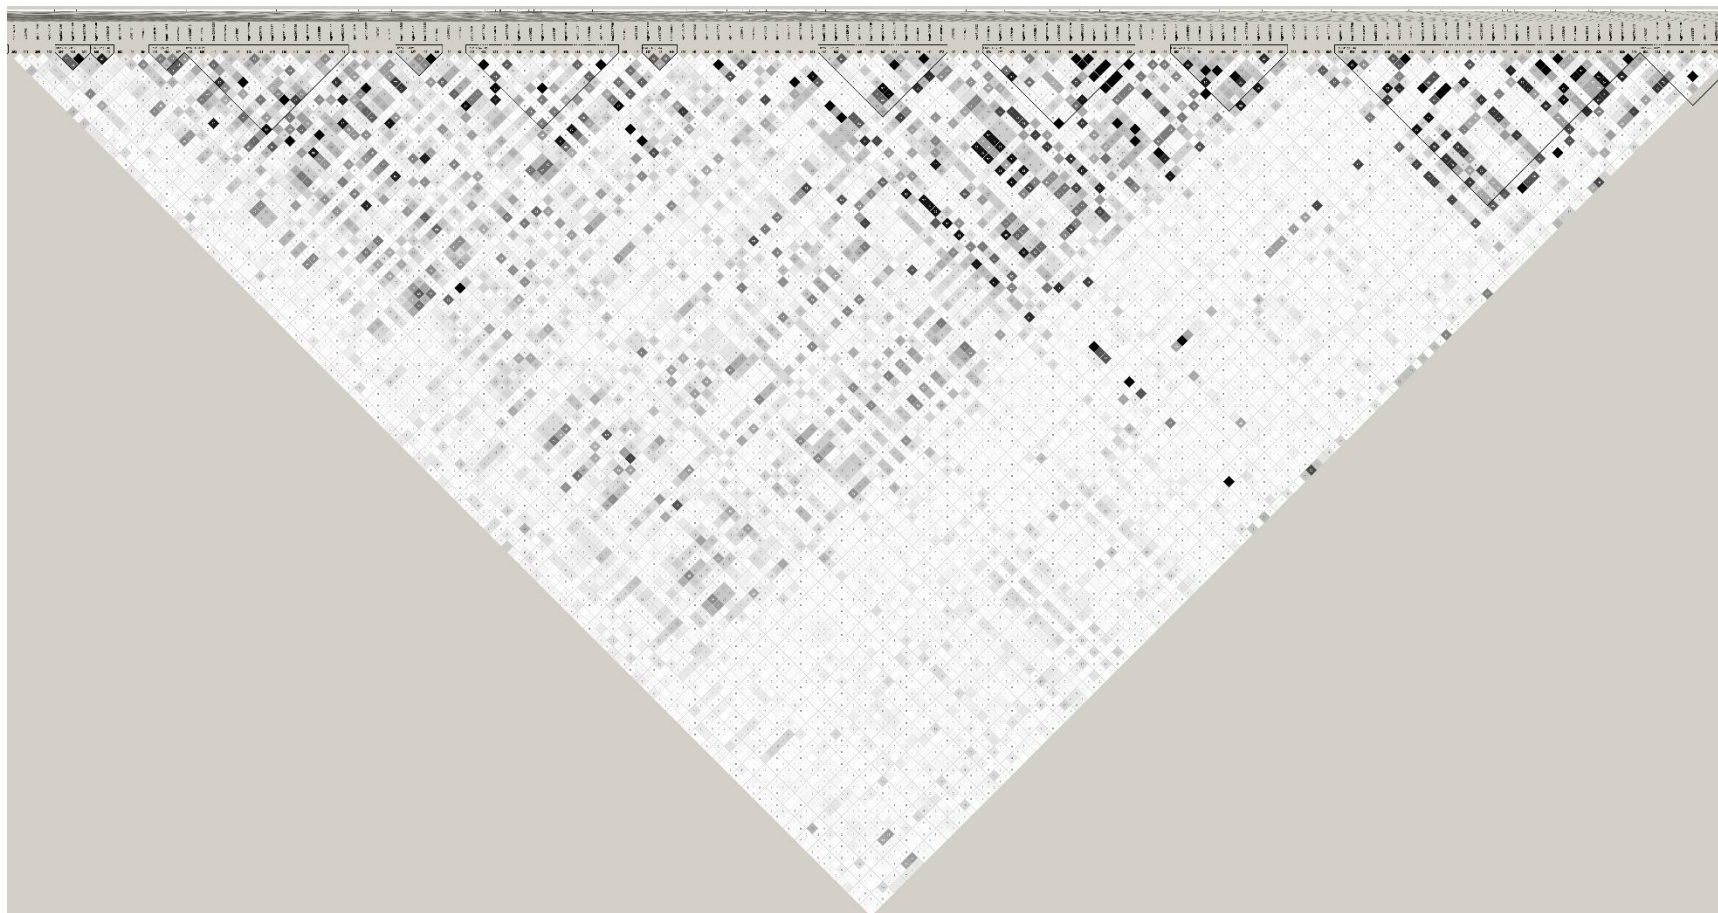

DISCOVERY DATASET: STAGE I/II LD PLOT FROM HAPLOVIEW

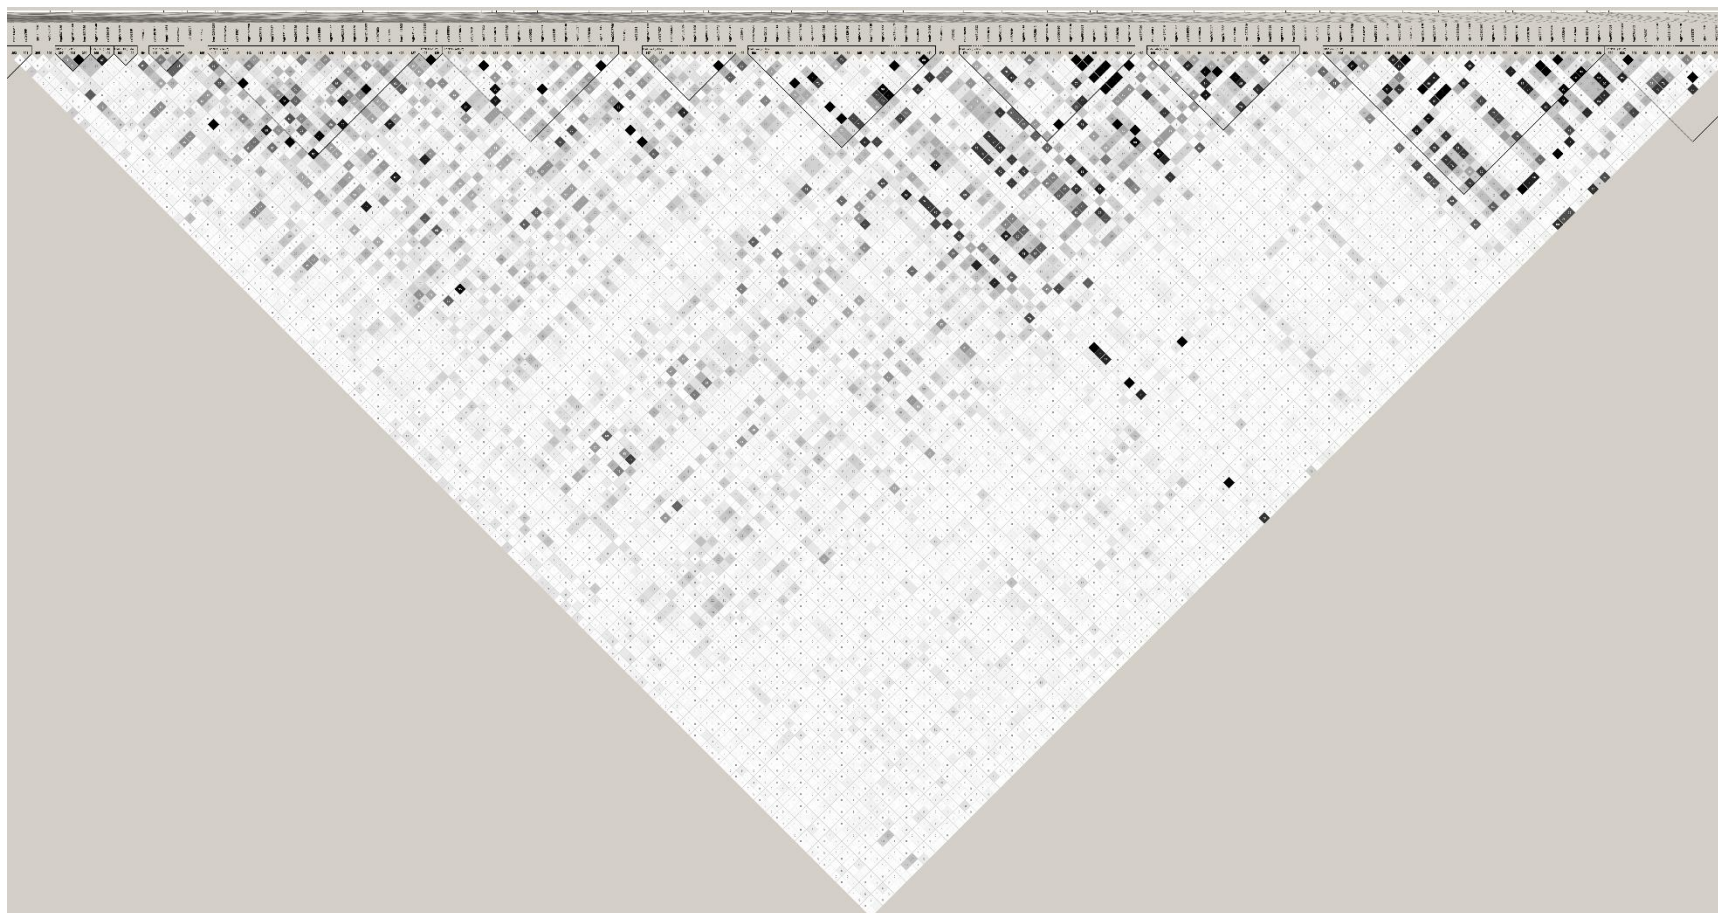

Supplement: pone.0146435.s003.pdf [file pone.0146435.s003.pdf]
