# Supplementary material for: A Germline Variant on Chromosome 4q31.1 Associates with Susceptibility to Developing Colon Cancer Metastasis
Source: PubMed Central journal article supplement (PMC4709047; doi:10.1371/journal.pone.0146435), 2016-01-11
Supplement: pone.0146435.s004.pdf [file pone.0146435.s004.pdf]

S4 File:

LD EVALUATION THROUGH PERMUTATION IN DISCOVERY AND VALIDATION #1  
DATASETS

We want to estimate the null distribution of the number of SNPs for which  $D'=1$  in the region without assuming independence of the SNPs. We generated 200 replicate permutations for each group (stages I/II and IV) to obtain the null distributions. For each individual and each SNP, separately, we permuted the genotype. The permutations were performed as follows:

The minor allele frequencies were kept exactly the same as in the original data.

Missing genotypes were allowed and randomized as genotypes in the permutations.

$D'$  between rs60745952 and each of the other SNPs was calculated.

We then counted, for each permutation, the number of SNPs in the region for which  $D'=1$  to obtain the empirical null distribution for the number of SNPs in the region for which  $D'=1$ .

The empirical null distributions for Stage I/II and Stage IV in the discovery and validation datasets are shown below as histograms:

### Permutation of Number of SNPs in Stage I/II for Discovery

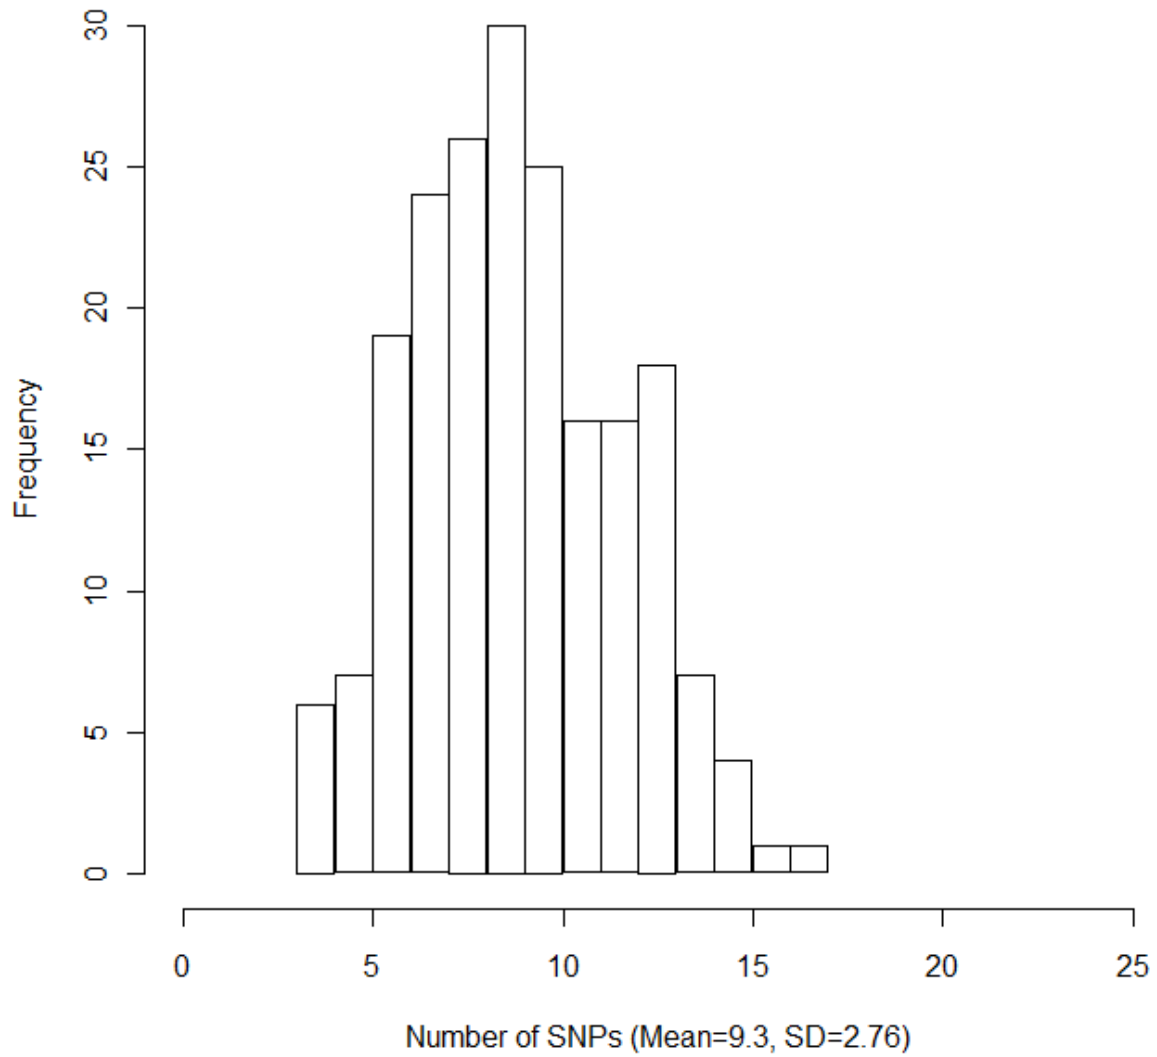

Frequency distribution of the number of SNPs with  $D'=1$  relative to rs60745952 as determined in 200 permutations of stage I/II cases in the discovery dataset.

### Permutation of Number of SNPs in Stage IV for Discovery

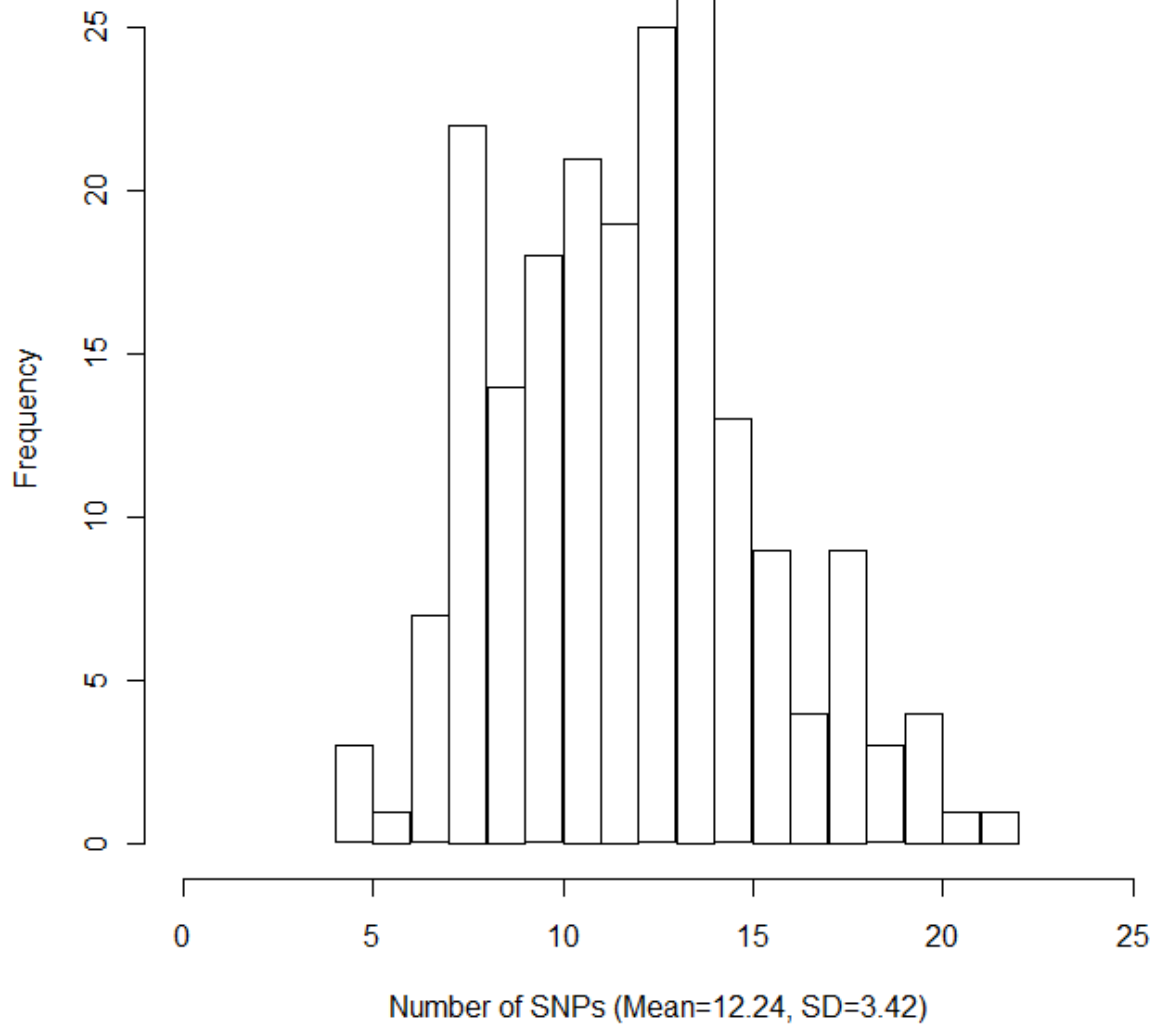

Frequency distribution of the number of SNPs with  $D'=1$  relative to rs60745952 as determined in 200 permutations of stage IV cases in the discovery dataset.

The empirical null distributions for Stage I/II and Stage IV in the Validation dataset #1 are shown below:

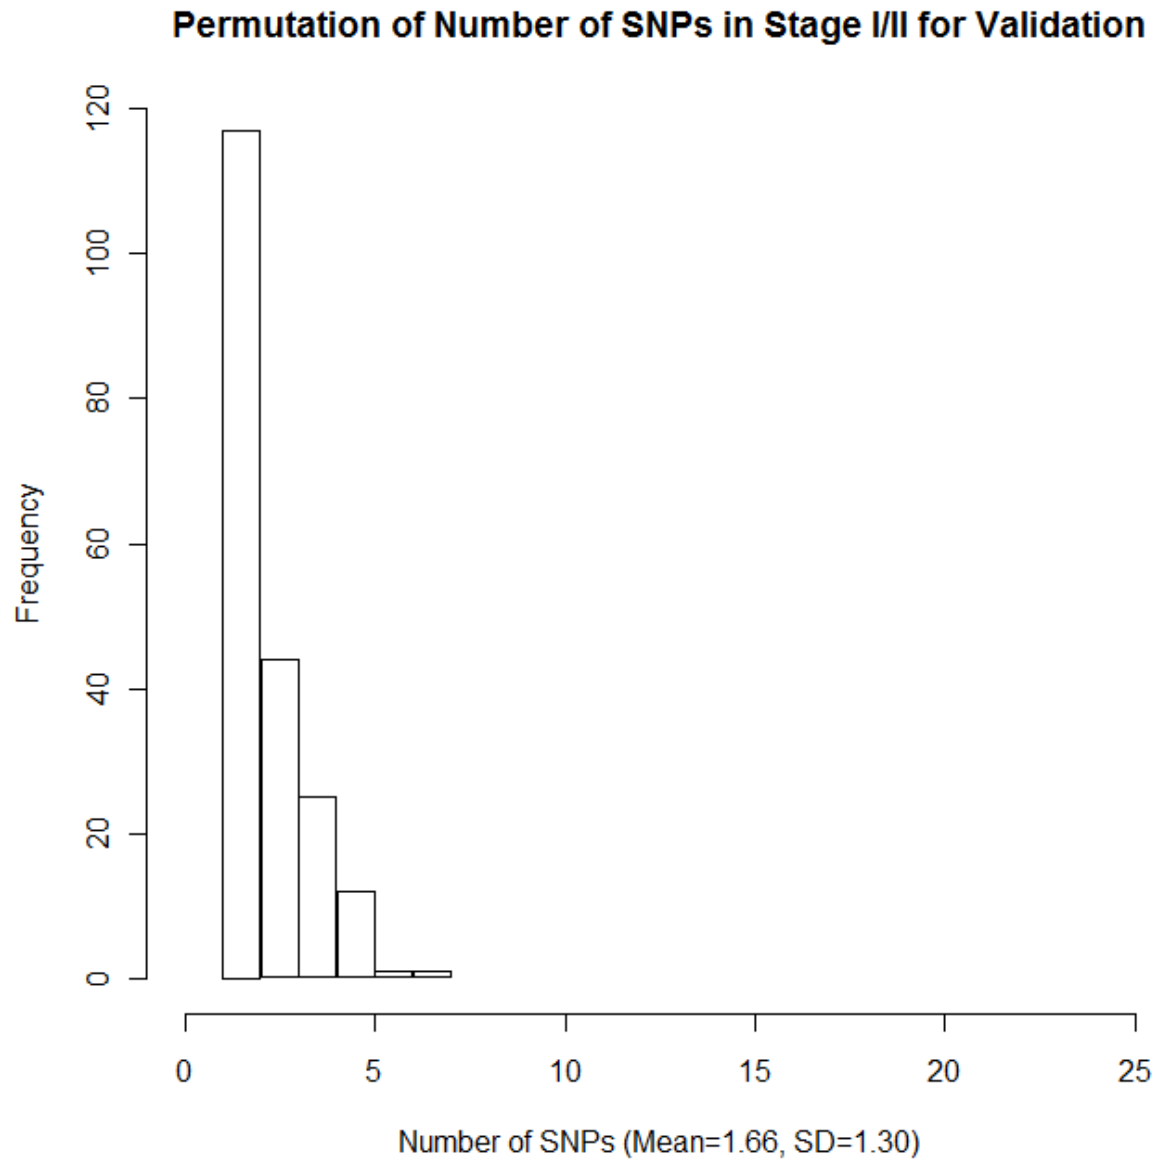

Frequency distribution of the number of SNPs with  $D'=1$  relative to rs60745952 as determined in 200 permutations of stage I/II cases in the validation dataset #1.

### Permutation of Number of SNPs in Stage IV for Validation

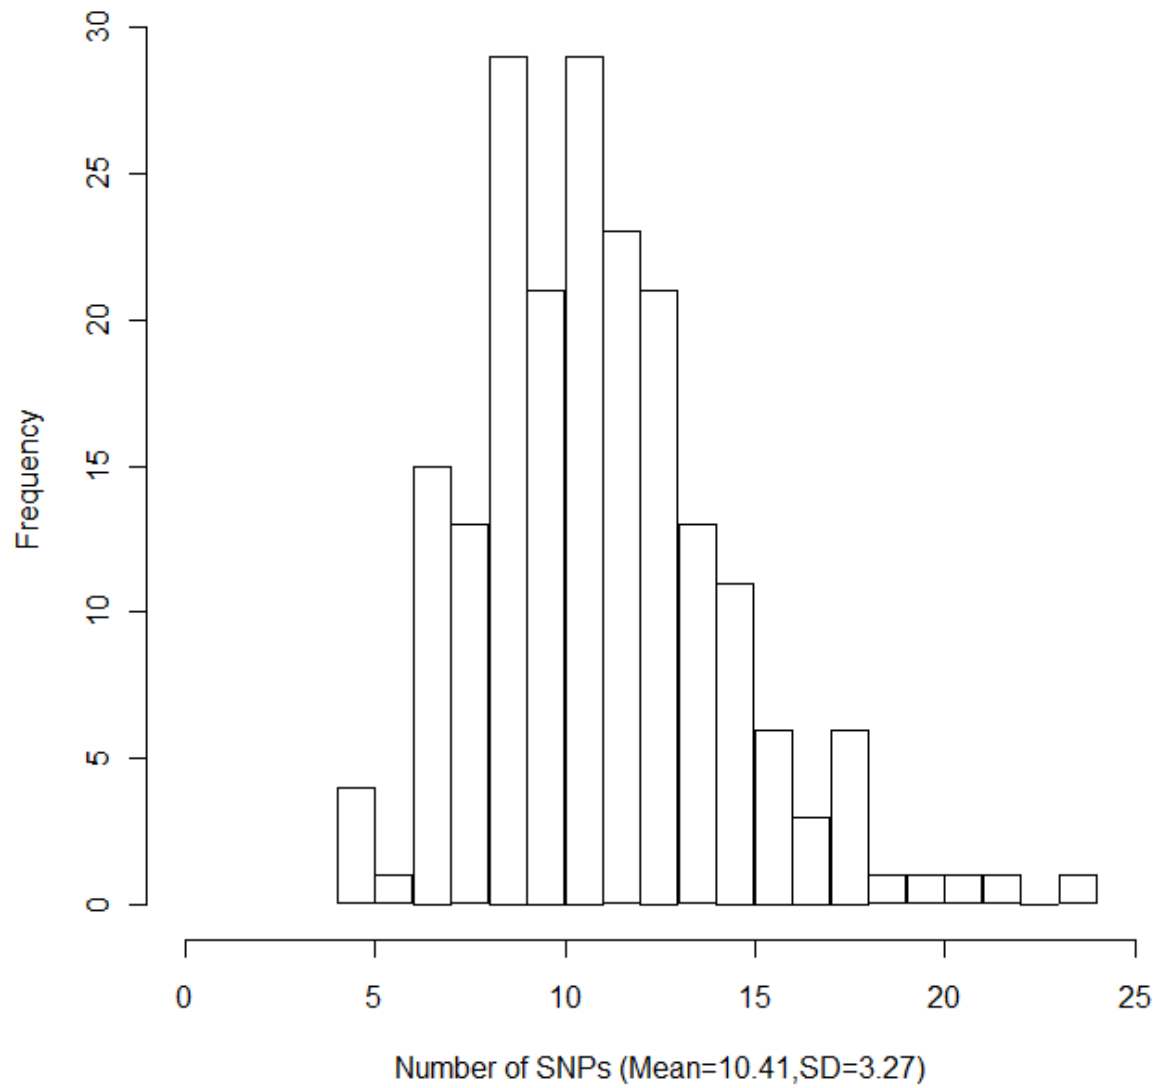

Frequency distribution of the number of SNPs with  $D'=1$  relative to rs60745952 as determined in 200 permutations of stage IV cases in the validation dataset #1.

We performed a test between the two groups of the number of SNPs for which  $D'=1$  based on the following assumptions:

The null distribution of the permutation statistic is normally distributed.

We have a sufficiently large number of permutation so that we can use a z score to perform the test (i.e. assume normality, with the permutation variance estimate, of the number of SNPs in the region for which  $D'=1$ ).

The observed count is denoted  $y$ . The variance from the permutation distribution is denoted  $V$ . The two groups are independent. Thus the variance of the difference between the two observed numbers is the sum of the variances, i.e. the variance of the difference is  $(V_1+V_2)$ , letting 1 denote stages I/II and 2 denote stage IV. We perform a one-sided test of the observed group difference. The corresponding z-statistic is  $(y_2-y_1)/\sqrt{(V_1+V_2)}$ . Table 3 in the text shows  $y$ ,  $SD=\sqrt{V}$ ,  $y_2-y_1$  and  $SD=\sqrt{(V_1+V_2)}$ . Except for the stage I/II validation dataset, the distributions are approximately normally distributed. The skewness of that distribution would tend to make the P-value conservative, i.e. too large. To verify that the assumption of normality was not critical, for each dataset we estimated the null distribution of the z-statistic as follows. We simulated 32 replicates from each group, noting the observed count and variance. We then paired each replicate from the stage I/II data with each replicate from the stage IV data to calculate 1024 replicate z-statistics. For each dataset, the z-statistic calculated from the observed counts given in Table 3 was larger than any of the simulated null distribution z-statistics, thus demonstrating that the p-values are robustly  $< 10^{-3}$ .
